# Supplementary material for: Natural polymer derived hydrogel bioink with enhanced thixotropy improves printability and cellular preservation in 3D bioprinting
Source: Royal Society of Chemistry journal article supplement (doi:10.1039/d2tb02786k), 2023-01-01
Supplement: d2tb02786k1.pdf [file d2tb02786k1.pdf]

## Supplementary information

### Natural Polymer Derived Hydrogel Bioink with Enhanced Thixotropy

#### Improves Printability and Cellular Preservation in 3D Bioprinting

Rongwei Cui<sup>1 #</sup>, Sumei Li<sup>1 #</sup>, Taiyi Li<sup>1 #</sup>, Xue Gou<sup>2</sup>, Tao Jing<sup>2</sup>, Guowei Zhang<sup>1, 2</sup>, Xiong Xiong<sup>1</sup>, Guihua Wei<sup>1</sup>, Zhongmin Jin<sup>3</sup>, Xiong Xiong<sup>1\*</sup>, Shuxin Qu<sup>2\*</sup>

1. School of Life Science and Engineering, Southwest Jiaotong University, Chengdu 610031, Sichuan, China
2. Key Laboratory of Advanced Technologies of Materials, Ministry of Education, School of Materials Science and Engineering, Southwest Jiaotong University, Chengdu 610031, Sichuan, China
3. School of Mechanical Engineering, Southwest Jiaotong University, Chengdu 610031, Sichuan, China

\*Corresponding author: Prof. Shuxin Qu, Tel: +86-28-87601897, Fax: +86-28-87601371,

E-mail: [qushuxin@swjtu.edu.cn](mailto:qushuxin@swjtu.edu.cn)

\*Corresponding author: Dr. Xiong Xiong, Tel: +86-28-87601897, Fax: +86-28-87601371, E-mail: [xiongxiong@home.swjtu.edu.cn](mailto:xiongxiong@home.swjtu.edu.cn)

# These authors contributed equally to this work.

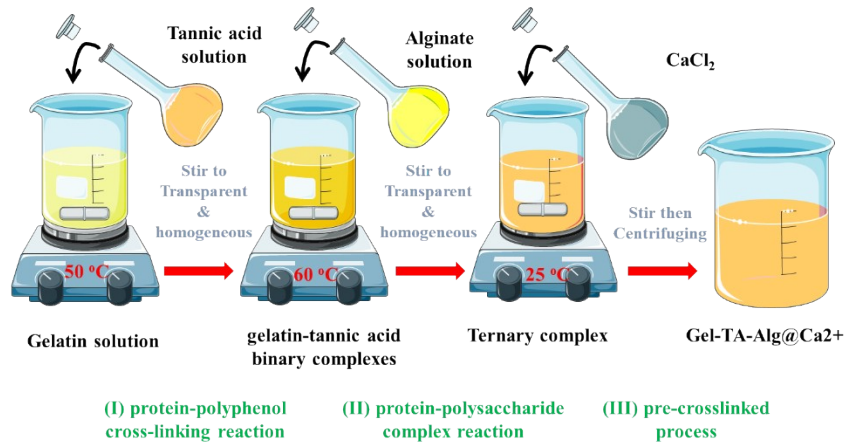

**Fig. S1.** Schematic of synthesis process of Gel-TA-Alg @Ca<sup>2+</sup>.

**Table S1** Detailed information of the printing parameters

| Term                                     | Parameter  |
|------------------------------------------|------------|
| Nozzle diameter (mm)                     | 0.6        |
| Extrusion width (mm)                     | 0.72       |
| Length* width * height (m <sup>3</sup> ) | 30 *30 *30 |
| Interior fill percentage (%)             | 10         |
| X/Y axis movement speed (mm/min)         | 1500       |
| Outline under speed (%)                  | 80         |

**Table S2** FTIR spectra characteristics of gelatin, tannic acid (TA), gelatin-TA composite (Gel-TA), sodium alginate (Alg) and Gel-TA-Alg composite

| Components | Wavenumber (cm <sup>-1</sup> ) | Assignment                                                                      |
|------------|--------------------------------|---------------------------------------------------------------------------------|
| Gelatin    | 3411                           | Amide A<br>the partially overlapped stretching vibrations of O-H and N-H groups |
|            | 2937                           | Amide B<br>The free amino acid O-H groups                                       |
|            | 1654                           | Amide I<br>stretching of the C=O                                                |
|            | 1544                           | Amide II<br>stretching of the N-H                                               |
|            | 1240                           | Amide III<br>stretching of the C-N and N-H groups                               |
|            | 3408                           | stretching vibrations O-H                                                       |
|            | 1716                           | stretching vibration of C=O groups of aromatic esters                           |
|            | 1612                           | aromatic C=C stretching                                                         |
| TA         | 1448                           | aromatic C-C stretching                                                         |
|            | 1323                           | bending vibrations for O-H                                                      |
|            | 1176                           | stretching vibrations for C-O                                                   |
|            | 1031                           | stretching vibrations C-O of polyols                                            |
|            | 760                            | stretching vibrations C-H out-of-plane deformation of benzene ring              |
| Gel-TA     | 3413                           | Amide A                                                                         |
|            | 2937                           | Amide B                                                                         |
|            | 1654                           | Amide I                                                                         |
|            | 1541                           | Amide II                                                                        |
|            | 1240                           | Amide III                                                                       |
|            | 3431                           | stretching vibrations O-H                                                       |
| Alg        | 1611                           | carboxylic acid salts (RCOO <sup>-</sup> )                                      |
|            | 1418                           | the C-O bond of the acid group (RCOOH)                                          |
|            | 1029                           | the vibrational stretch of the C-O and C-C of the pyranose ring                 |
| Gel-TA-Alg | 3418                           | stretching vibrations O-H                                                       |
|            | 1031                           | carboxylic groups (-COO)                                                        |

**Table S3** Different contents of protein secondary structures before and after crosslinking

| Protein secondary structure | Gelatin (%) | Gel-TA (%) |
|-----------------------------|-------------|------------|
| Random coil                 | 16.8        | 11.9       |
| β-sheet                     | 25.6        | 19.1       |
| α-helix                     | 11.75       | 9.3        |
| β-corner                    | 37.0        | 48.5       |

**Table S4** Detailed information for characterizing of injectability

| Group | Nozzle shape | Needle diameter( $\mu\text{m}$ ) | The needle type(G) |
|-------|--------------|----------------------------------|--------------------|
| Co N  | Cone         | 410                              | 22                 |
| Cy N1 | cylinder     | 410                              | 22                 |
| Cy N2 | cylinder     | 260                              | 25                 |
| Cy N3 | cylinder     | 600                              | 20                 |

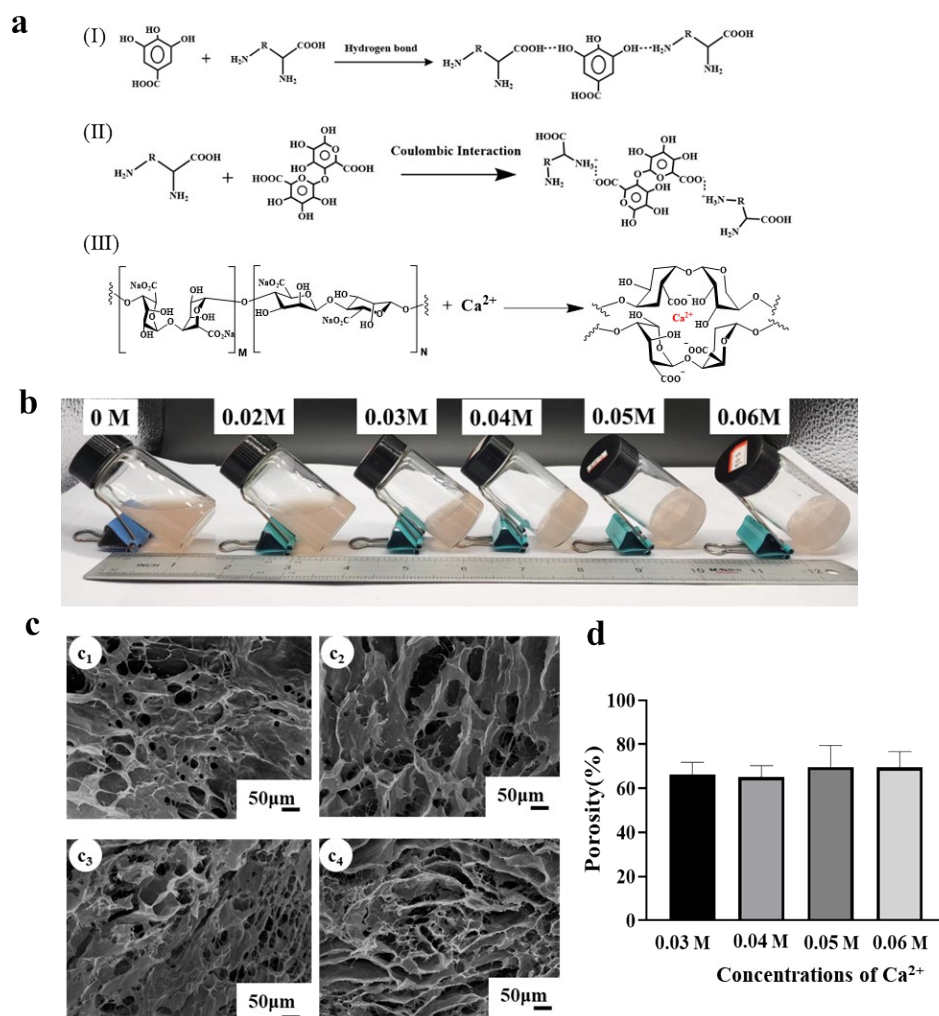

**Fig. S2.** Synthesis and characterization of Gel-TA-Alg@Ca<sup>2+</sup>. (a) The hypothesized chemical reaction equation of Gel-TA-Alg@Ca<sup>2+</sup> according to the infrared results and literatures; (b) Images of Gel-TA-Alg@Ca<sup>2+</sup> with different concentrations of Ca<sup>2+</sup> before and after gelling; (c) The micromorphology and porosity of Gel-TA-Alg@Ca<sup>2+</sup> with pre-crosslinking of different concentrations of Ca<sup>2+</sup>; (d) Porosity of hydrogels with different Ca<sup>2+</sup>.

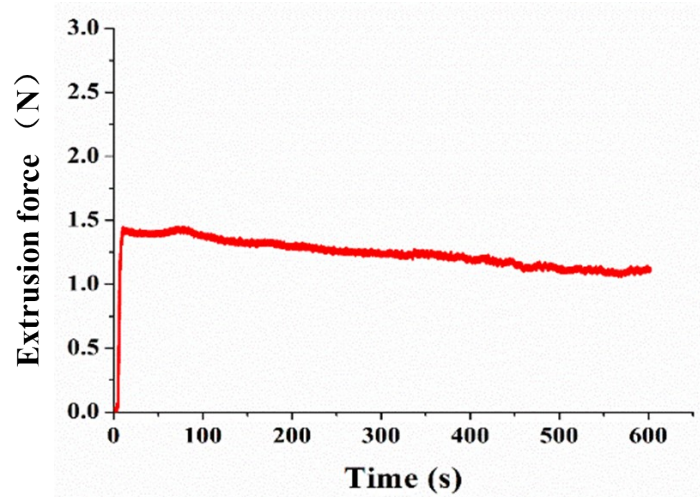

**Fig. S3** The curve of extrusion force versus time to extrude water at the speed of 1.5 mm/s by a needle with the diameter of 410  $\mu\text{m}$ .

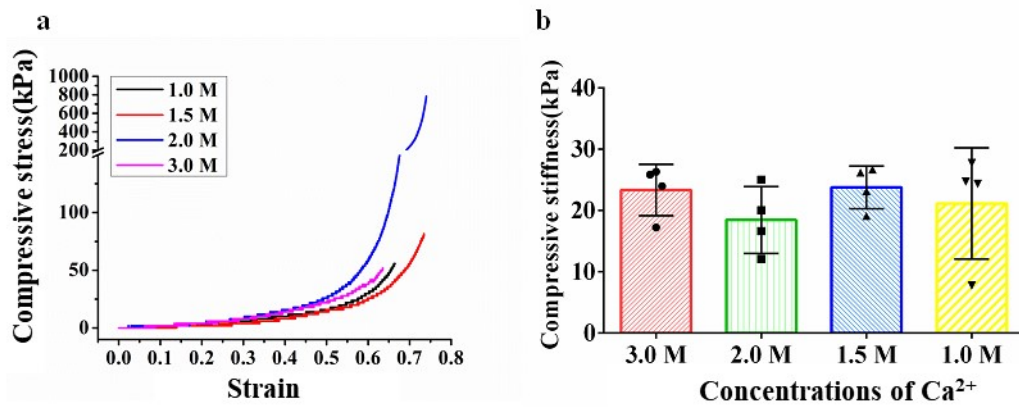

**Fig. S4** The mechanical properties of Gel-TA-Alg@ $\text{Ca}^{2+}$  using a universal mechanical testing machine. (a) Stress-strain curves of Gel-TA-Alg@ $\text{Ca}^{2+}$  after post-crosslinking with different concentrations of  $\text{Ca}^{2+}$  for 24 h; (b) Compression modulus results of 5%-15% of Gel-TA-Alg@ $\text{Ca}^{2+}$  in the linear strain region.
